# Supplementary material for: Cellular and molecular evidence that synaptic Schwann cells contribute to aging of mouse neuromuscular junctions
Source: PubMed Central journal article supplement (PMC10652323; doi:10.1111/acel.13981), 2023-09-28
Supplement: ACEL-22-e13981-s001.pdf [file ACEL-22-e13981-s001.pdf]

**Supplementary Table 1.** Old SC DEGs identified in other studies.

| <b>Gene</b>   | <b>Read Count</b> | <b>log2 FC vs young SC</b> | <b>p-value</b> | <b>Reference</b>       |
|---------------|-------------------|----------------------------|----------------|------------------------|
| <i>Cybb</i>   | 15483.41          | 1.102597                   | 0.041861139    | (Verdier et al., 2012) |
| <i>Tnxb</i>   | 10621.51          | -1.81268                   | 0.027581426    | (Verdier et al., 2012) |
| <i>Mpeg1</i>  | 6772.199          | 2.083542                   | 0.001261864    | (Verdier et al., 2012) |
| <i>Clec7a</i> | 4275.218          | 1.429666                   | 0.034235293    | (Verdier et al., 2012) |
| <i>Ccl8</i>   | 4053.56           | 2.789377                   | <0.0001        | (Verdier et al., 2012) |
| <i>Cfb</i>    | 3921.807          | 1.67177                    | 0.000557927    | (Verdier et al., 2012) |
| <i>Efemp2</i> | 2032.541          | -1.42965                   | 0.008981677    | (Verdier et al., 2012) |
| <i>Agpat4</i> | 1687.745          | -1.21694                   | 0.004404667    | (Verdier et al., 2012) |
| <i>Cd274</i>  | 1203.697          | 1.654163                   | 0.011415664    | (Verdier et al., 2012) |
| <i>Ifi47</i>  | 1200.834          | 1.569063                   | 0.000325352    | (Verdier et al., 2012) |
| <i>Tlr13</i>  | 1180.075          | 1.652889                   | 0.002367042    | (Verdier et al., 2012) |
| <i>S100a8</i> | 286.6353          | 6.354282                   | 0.019733296    | (Verdier et al., 2012) |
| <i>S100a9</i> | 190.2979          | 6.537318                   | 0.001103747    | (Verdier et al., 2012) |
| <i>Col3a1</i> | 75630.87          | -2.18346                   | <0.0001        | (Painter et al., 2014) |
| <i>Col1a2</i> | 27984.84          | -2.02834                   | <0.0001        | (Painter et al., 2014) |
| <i>Col1a1</i> | 22430.61          | -2.07517                   | <0.0001        | (Painter et al., 2014) |
| <i>Mfap5</i>  | 21761.55          | -2.03275                   | 0.009187091    | (Painter et al., 2014) |
| <i>Col6a1</i> | 11932.78          | -1.38679                   | 0.028750326    | (Painter et al., 2014) |
| <i>Col6a2</i> | 6172.605          | -1.27614                   | 0.044538465    | (Painter et al., 2014) |
| <i>Spon2</i>  | 1067.843          | -1.65701                   | 0.009887987    | (Painter et al., 2014) |
| <i>Itm2a</i>  | 1038.862          | -1.70748                   | 0.000418984    | (Painter et al., 2014) |

**Supplementary Table 2.** Repair SC genes.

| <b>Gene</b>   | <b>SC Log<sub>2</sub> FC<br/>(Old v YA)</b> | <b>p &lt; 0.05?</b> | <b>PSC Log<sub>2</sub> FC<br/>(Old v YA)</b> | <b>p &lt; 0.05?</b> | <b>Reference</b>                                  |
|---------------|---------------------------------------------|---------------------|----------------------------------------------|---------------------|---------------------------------------------------|
| <i>Artn</i>   | 0.68                                        | N/A                 | -1.68                                        | No                  | (K. R. Jessen & Mirsky, 2016)                     |
| <i>Bdnf</i>   | 0.35                                        | No                  | -0.03                                        | No                  | (K. R. Jessen & Mirsky, 2016)                     |
| <i>Ccl2</i>   | -0.04                                       | No                  | 1.53                                         | No                  | (K. R. Jessen & Mirsky, 2016;<br>Ma et al., 2018) |
| <i>Ccnd1</i>  | 0.30                                        | No                  | -0.57                                        | No                  | (Atanasoski et al., 2001; Kim<br>et al., 2001)    |
| <i>Epop</i>   | -0.76                                       | No                  | 1.35                                         | No                  | (K. R. Jessen & Mirsky, 2016)                     |
| <i>Epor</i>   | 0.02                                        | No                  | 2.02                                         | No                  | (K. R. Jessen & Mirsky, 2016)                     |
| <i>Fgf5</i>   | 1.22                                        | No                  | 1.64                                         | No                  | (Barrette et al., 2010)                           |
| <i>Gdnf</i>   | -0.75                                       | No                  | 0.77                                         | No                  | (K. R. Jessen & Mirsky, 2016)                     |
| <i>Gfap</i>   | 0.17                                        | No                  | 1.81                                         | No                  | (K. R. Jessen & Mirsky, 2016)                     |
| <i>Il1a</i>   | 0.95                                        | No                  | 3.39                                         | N/A                 | (K. R. Jessen & Mirsky, 2016)                     |
| <i>Il1b</i>   | 0.28                                        | No                  | 3.37                                         | N/A                 | (K. R. Jessen & Mirsky, 2016)                     |
| <i>L1cam</i>  | 0.52                                        | No                  | -0.31                                        | No                  | (K. R. Jessen & Mirsky, 2016)                     |
| <i>Lif</i>    | 0.52                                        | No                  | 2.08                                         | No                  | (K. R. Jessen & Mirsky, 2016)                     |
| <i>Ncam1</i>  | -0.03                                       | No                  | -0.57                                        | No                  | (K. R. Jessen & Mirsky, 2016)                     |
| <i>Ngf</i>    | -1.40                                       | Yes                 | 0.07                                         | No                  | (K. R. Jessen & Mirsky, 2016)                     |
| <i>Ngfr</i>   | -0.12                                       | No                  | 0.76                                         | No                  | (K. R. Jessen & Mirsky, 2016)                     |
| <i>Ntf3</i>   | -0.83                                       | No                  | -0.26                                        | No                  | (K. R. Jessen & Mirsky, 2016)                     |
| <i>Pou3f1</i> | -1.30                                       | No                  | -0.92                                        | No                  | (K. R. Jessen & Mirsky, 2016)                     |
| <i>Ptn</i>    | -1.72                                       | Yes                 | -0.82                                        | No                  | (K. R. Jessen & Mirsky, 2016)                     |
| <i>Tnf</i>    | 0.28                                        | No                  | 2.02                                         | No                  | (K. R. Jessen & Mirsky, 2016)                     |
| <i>Vegfa</i>  | -0.84                                       | No                  | 1.17                                         | No                  | (K. R. Jessen & Mirsky, 2016)                     |
